# Supplementary material for: Genomic characterization of rare molecular subclasses of hepatocellular carcinoma
Source: PubMed Central journal article supplement (PMC8490450; doi:10.1038/s42003-021-02674-1), 2021-10-04
Supplement: 42003_2021_2674_MOESM1_ESM.pdf [file 42003_2021_2674_MOESM1_ESM.pdf]

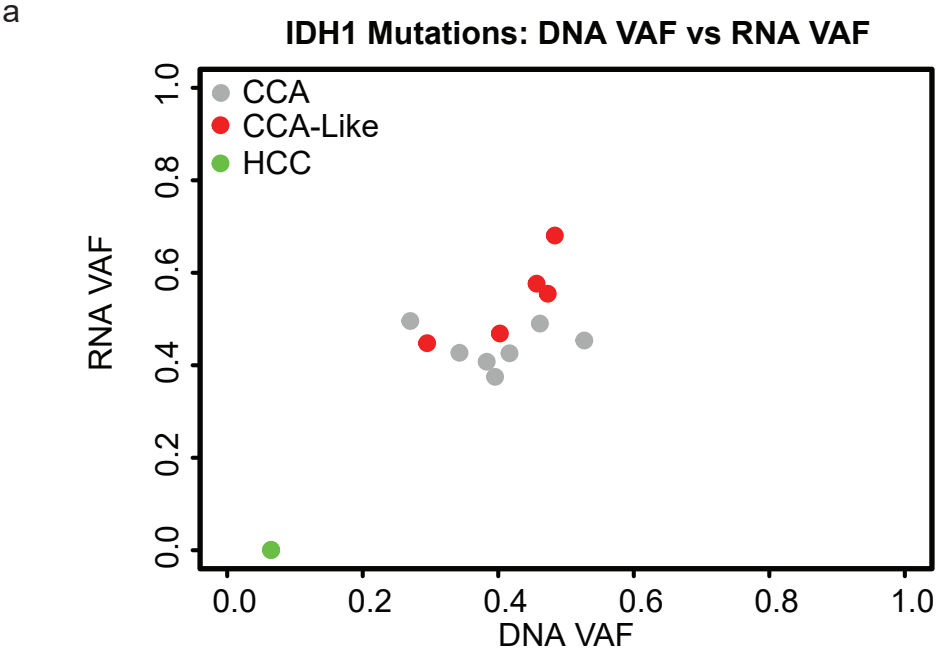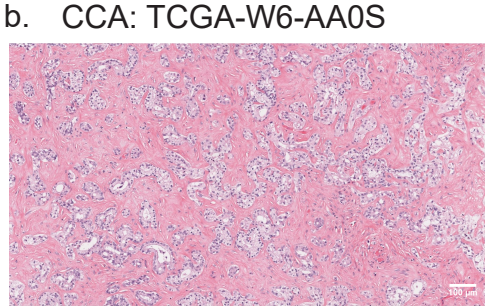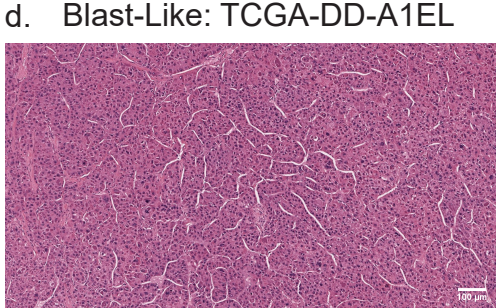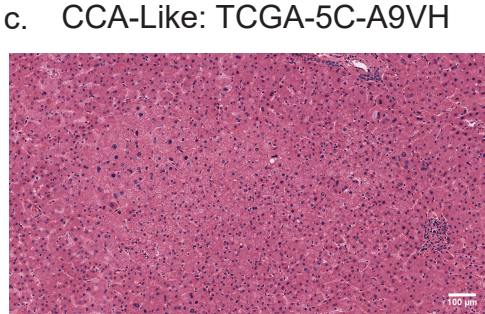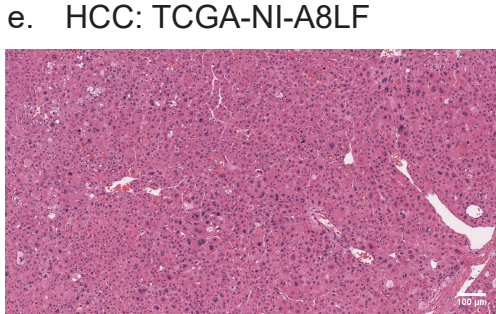

Supplementary Figure 1 - (a) Variant allele frequencies for IDH1 were calculated from both the DNA and RNA sequencing reads. Tumor classes are indicated by color (grey=CCA, red=CCA-Like, green=HCC). (b) Representative H&E slides (20x) of CCA (c) CCA-Like (d) Blast-Like (e) HCC. (<https://cancer.digitalslidearchive.org/>).

# Supplementary Figure 2

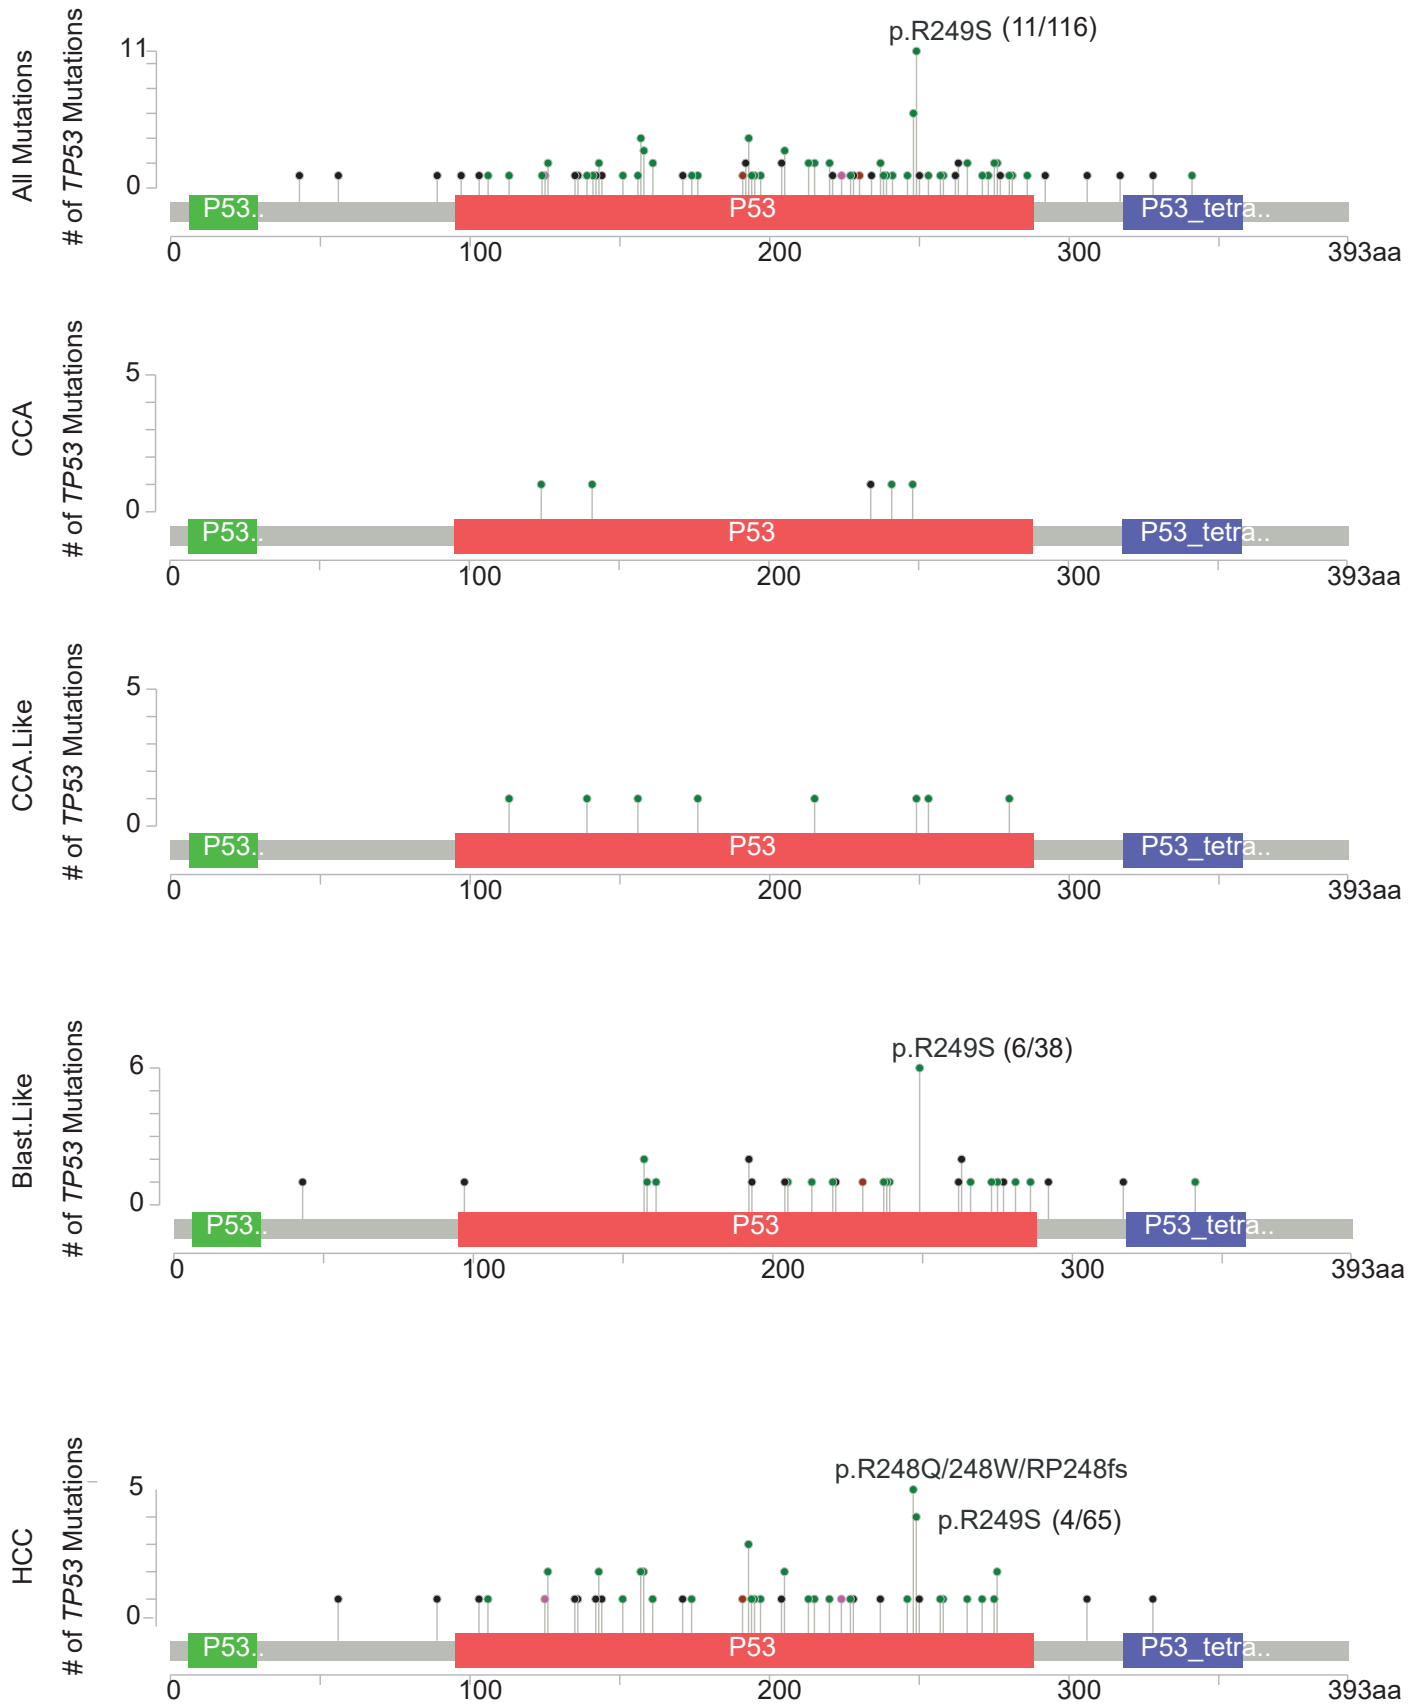

Supplementary Figure 2 – Lollipop plots for TP53 mutations are shown for the entire cohort and by tumor class. R249S mutation ratios are shown as (number of R249S mutations)/(total number of TP53 mutations) per group.

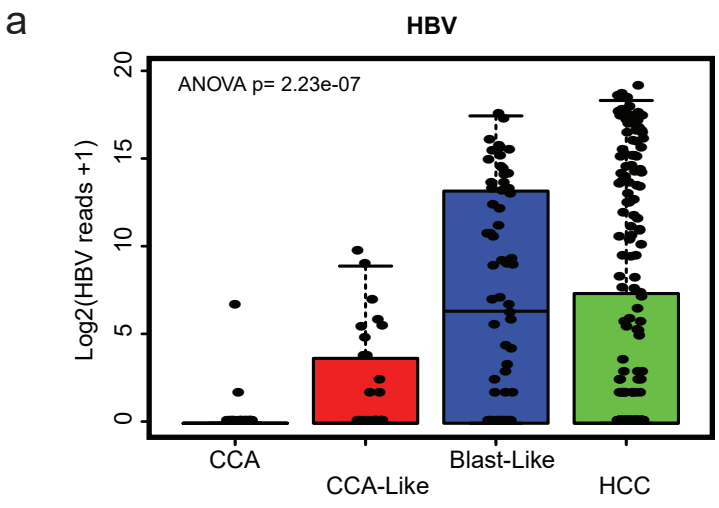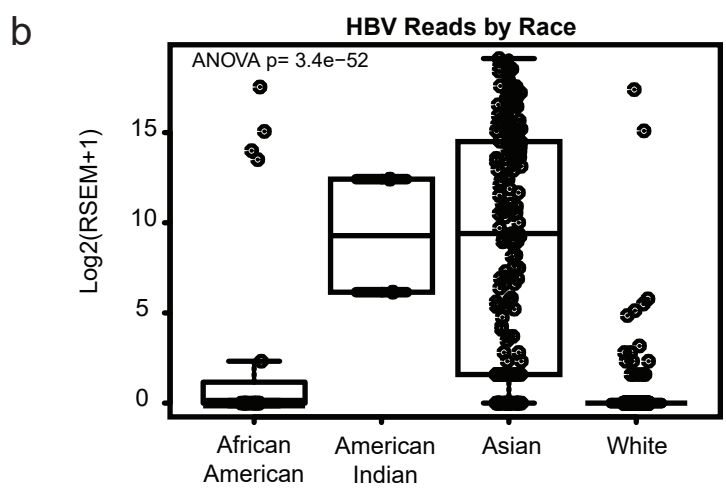

Supplementary Figure 3 - (a) Reads aligning to HBV are plotted by tumor class and (b) reported race

# Supplementary Figure 4

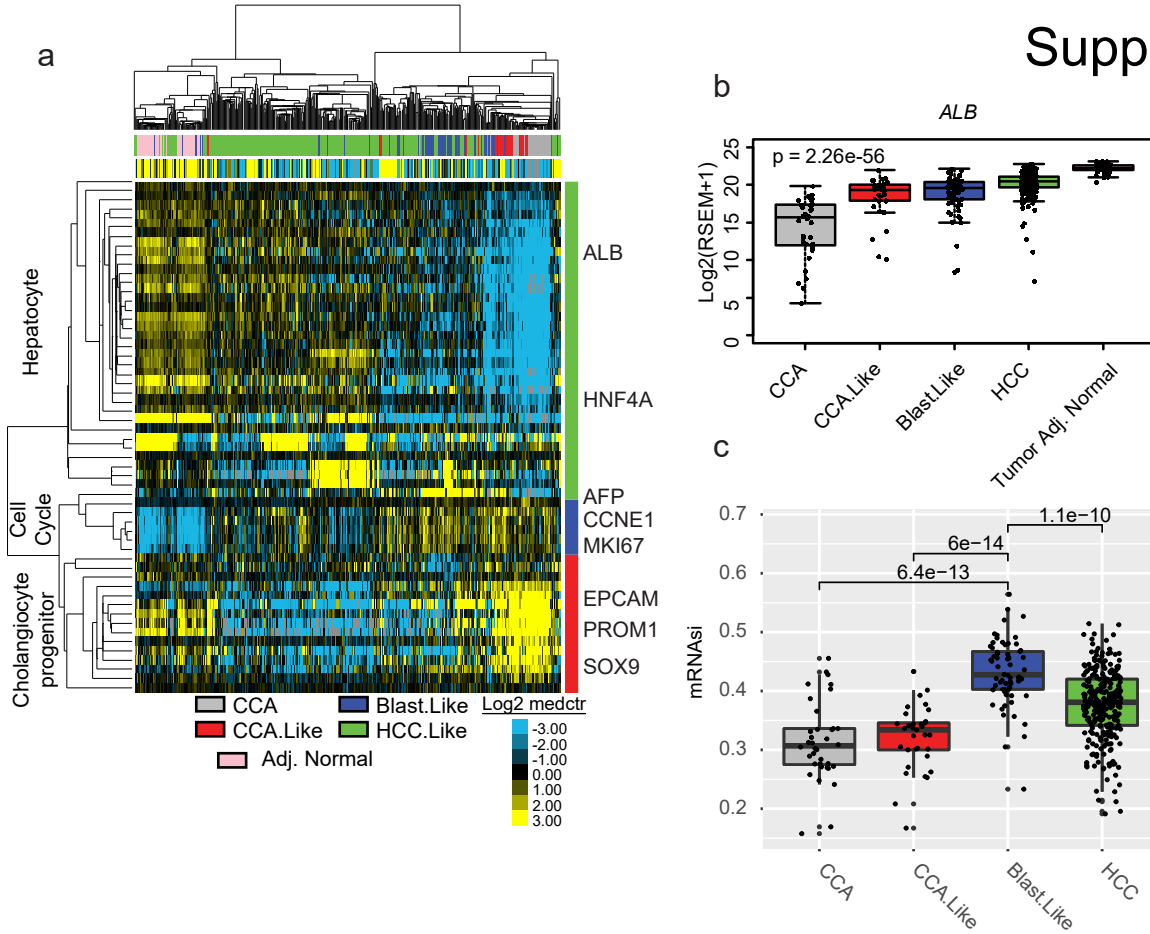

Supplementary Figure 4 – (a) CCA/HCC tumors and adjacent normal tissues clustered with cell type specific markers of hepatocytes and cholangiocytes cells and cell cycle markers from Hu et. al.<sup>13</sup>. Gene expression data was log<sub>2</sub> transformed and median centered across the CCA/HCC cohort. Annotation bar represents sample subclasses. (b) Gene expression for *ALB* is shown per CCA/HCC group (ANOVA  $p=2.26e-56$ ). Gene expression values represent the log<sub>2</sub> transformed RSEM+1 value. (c) The expression based stemness index from Malta et. al. was plotted by class. p-values represents t-test.

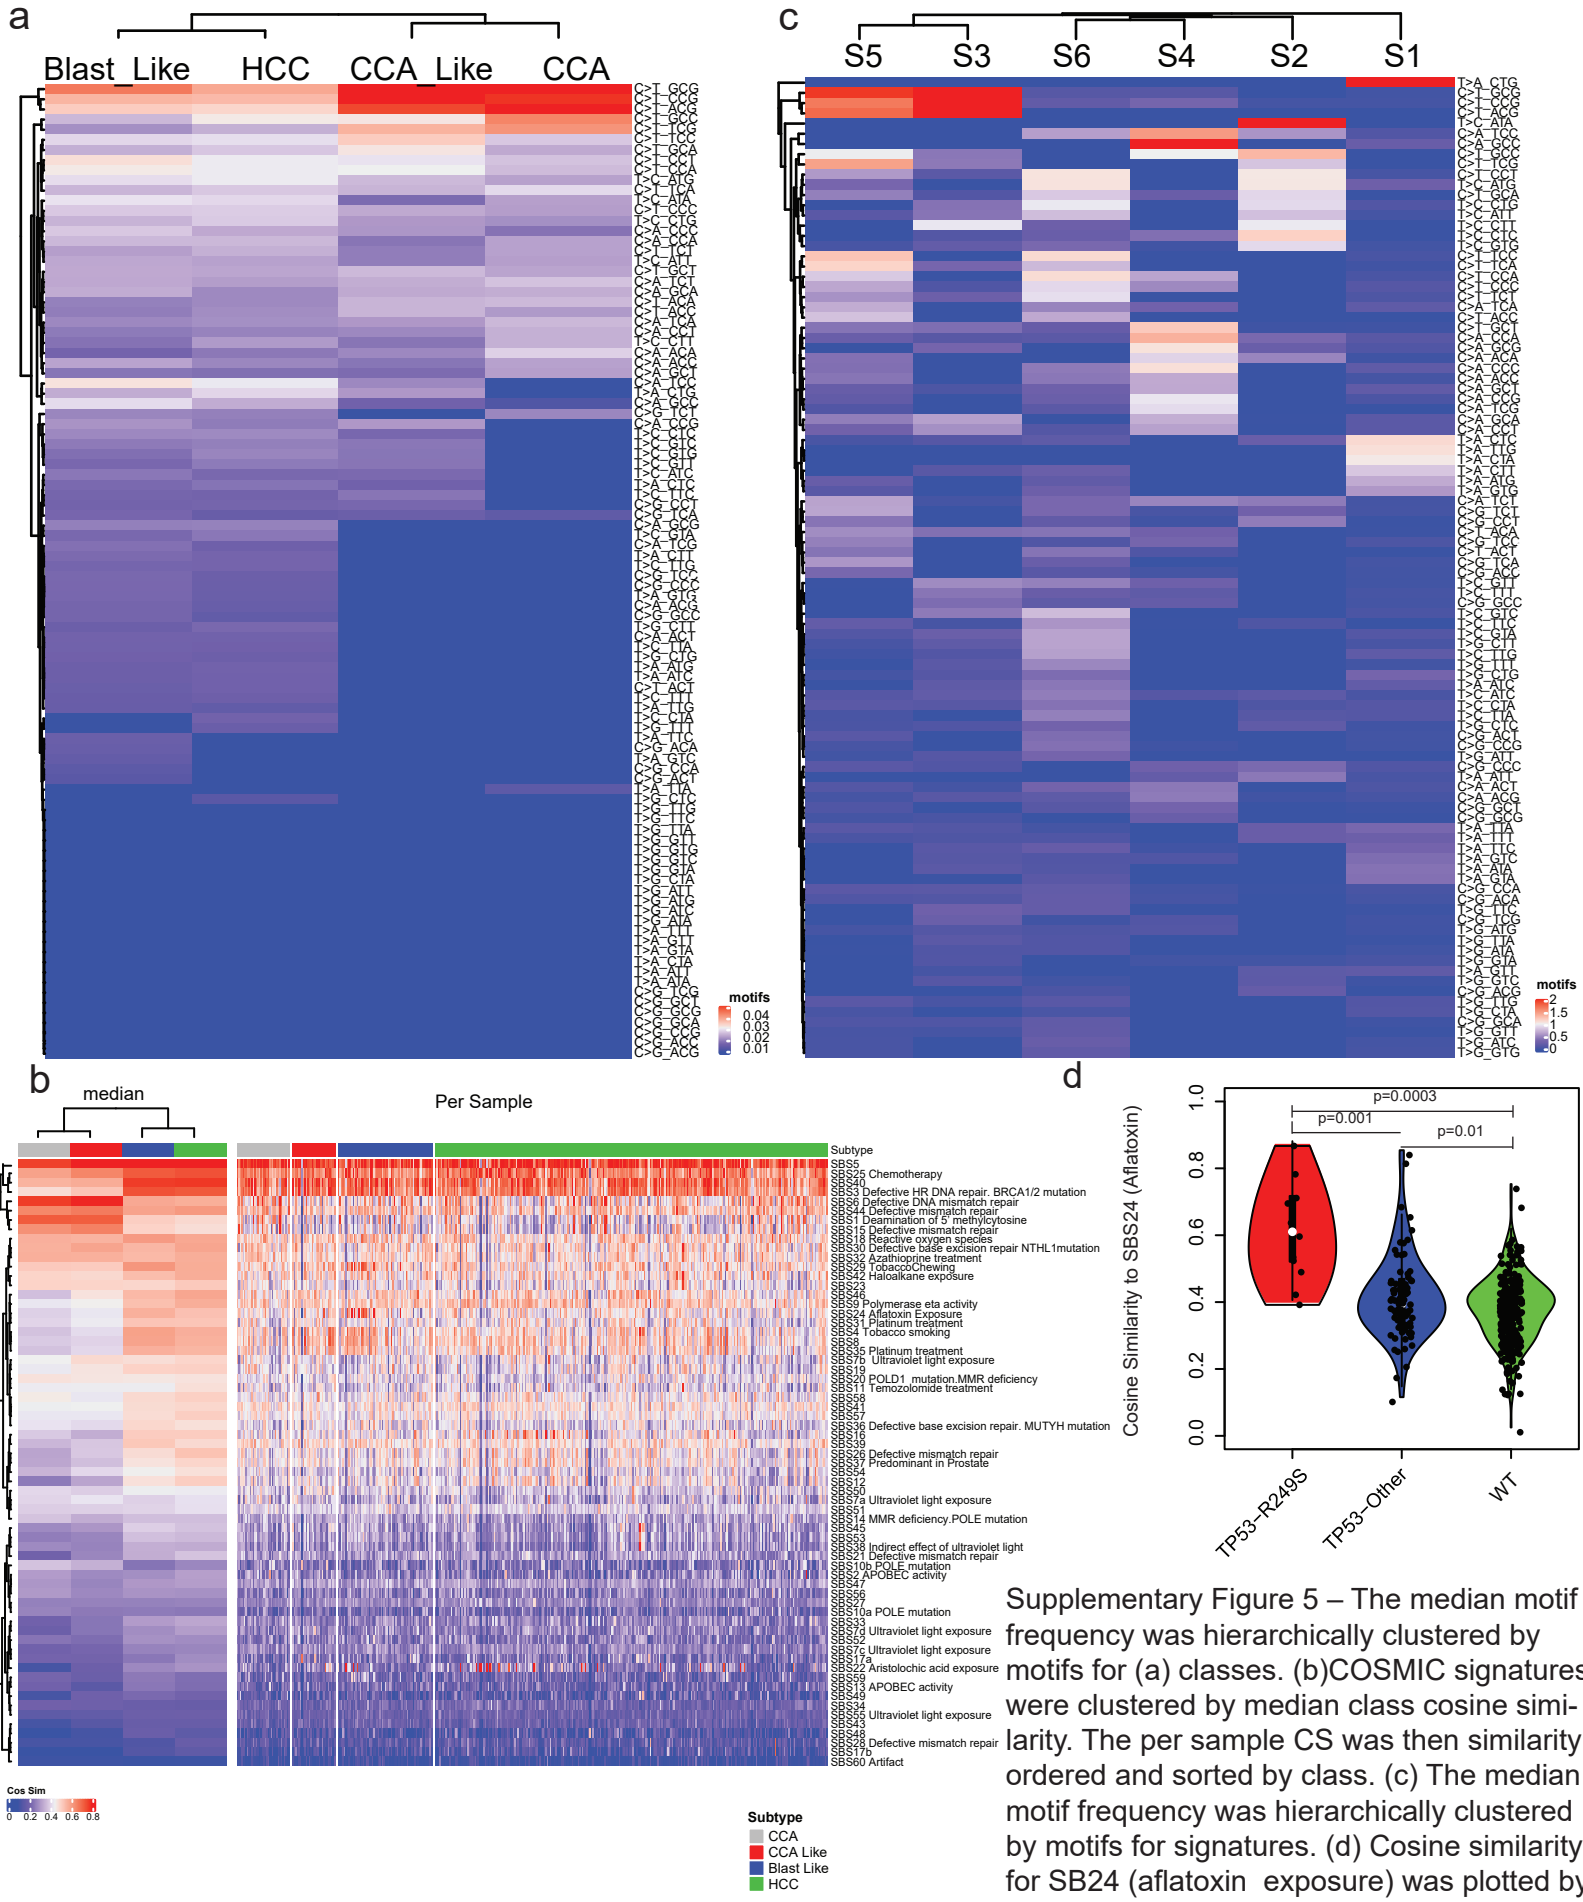

Supplementary Figure 5 – The median motif frequency was hierarchically clustered by motifs for (a) classes. (b) COSMIC signatures were clustered by median class cosine similarity. The per sample CS was then similarity ordered and sorted by class. (c) The median motif frequency was hierarchically clustered by motifs for signatures. (d) Cosine similarity for SB24 (aflatoxin exposure) was plotted by TP53 mutation type (TP53 R249S, Others or WT) and pairwise t-test were performed to determine significance.

# Supplementary Figure 6

a

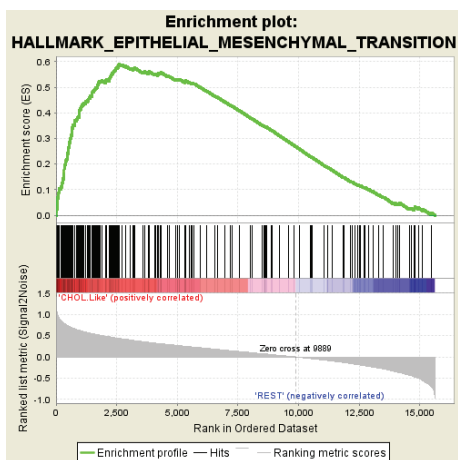

b

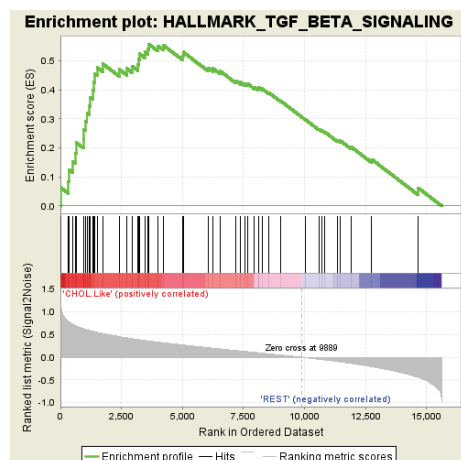

c

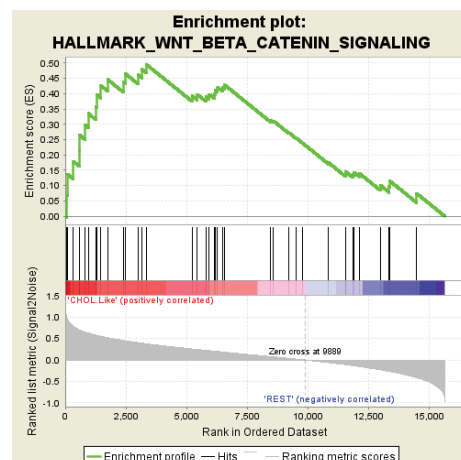

d

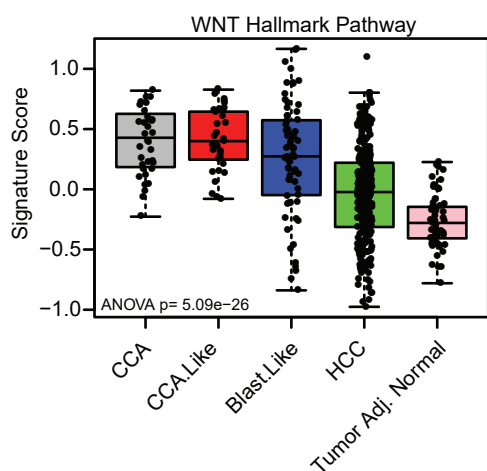

Supplementary Figure 6 - (a-c) GSEA was performed comparing CCA-Like vs. Blast-Like/HCC. Plots of enrichment scores are shown for pathways relating to transdifferentiation. (d) Signature score associated with WNT pathway are plotted by class.

# Supplementary Figure 7

a

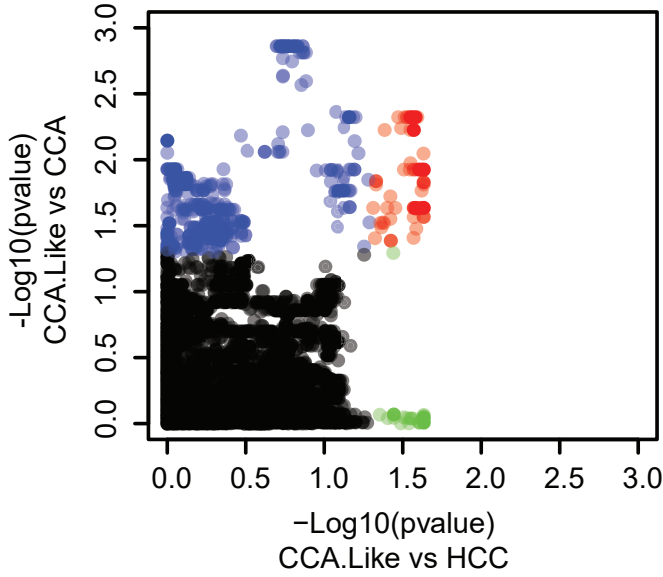

● Neither  
● Significant vs CCA  
● Significant vs HCC  
● Significant in both comparisons

b

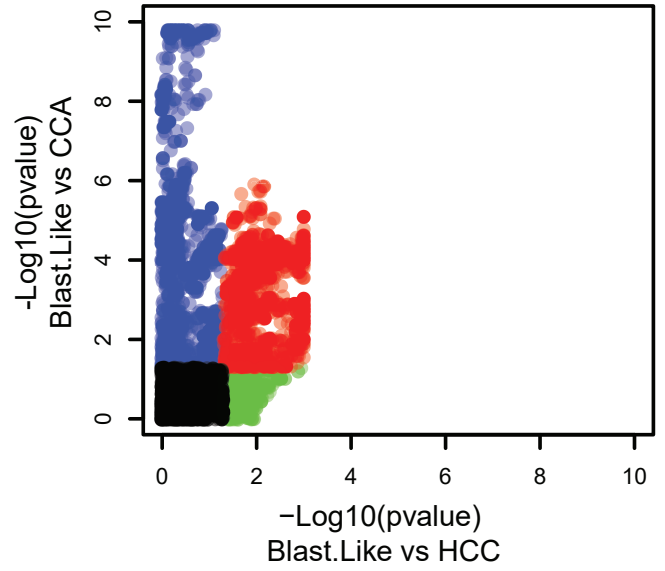

c

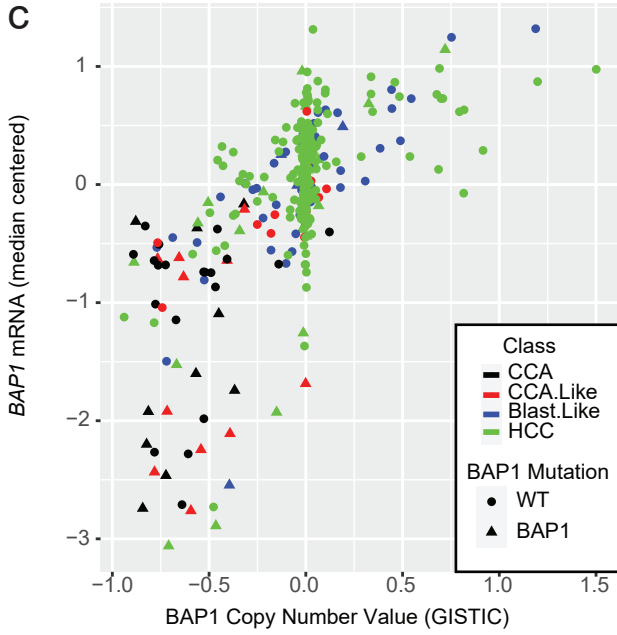

d

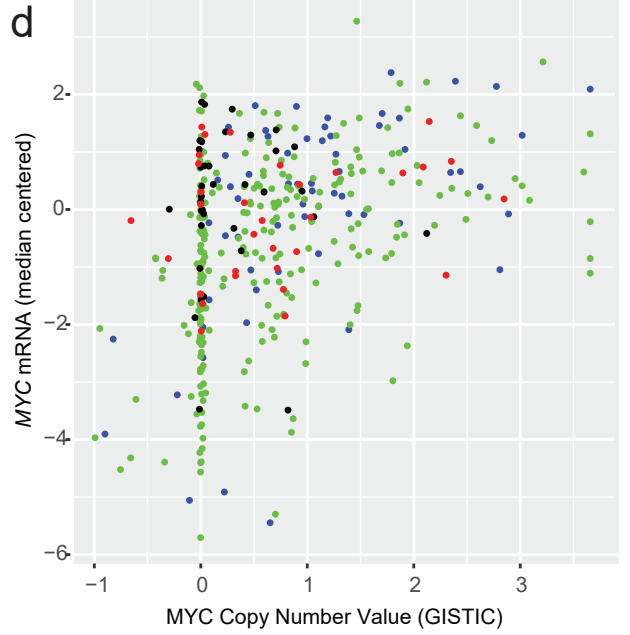

e

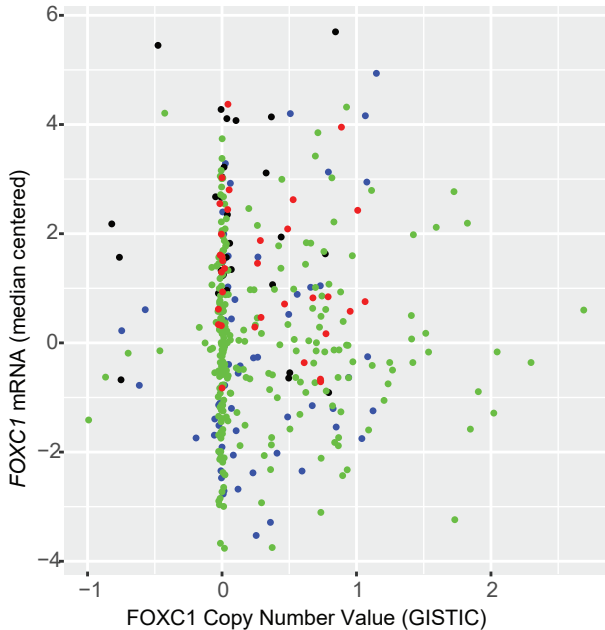

Supplementary Figure 7- (a) Pairwise two sample t-tests were performed by segment and p-values were corrected for multiple comparisons.  $-\log_{10}$  (adjusted pvalue) was plotted for CCA-Like vs CCA and HCC and (b) Blast-Like vs. CCA and HCC. Log<sub>2</sub> median centered gene expression was plotted against the GISTIC intensity values for (c) BAP1, (d) MYC and (e) FOXC1. For BAP1 mutations noted by symbols.

# Supplementary Figure 8

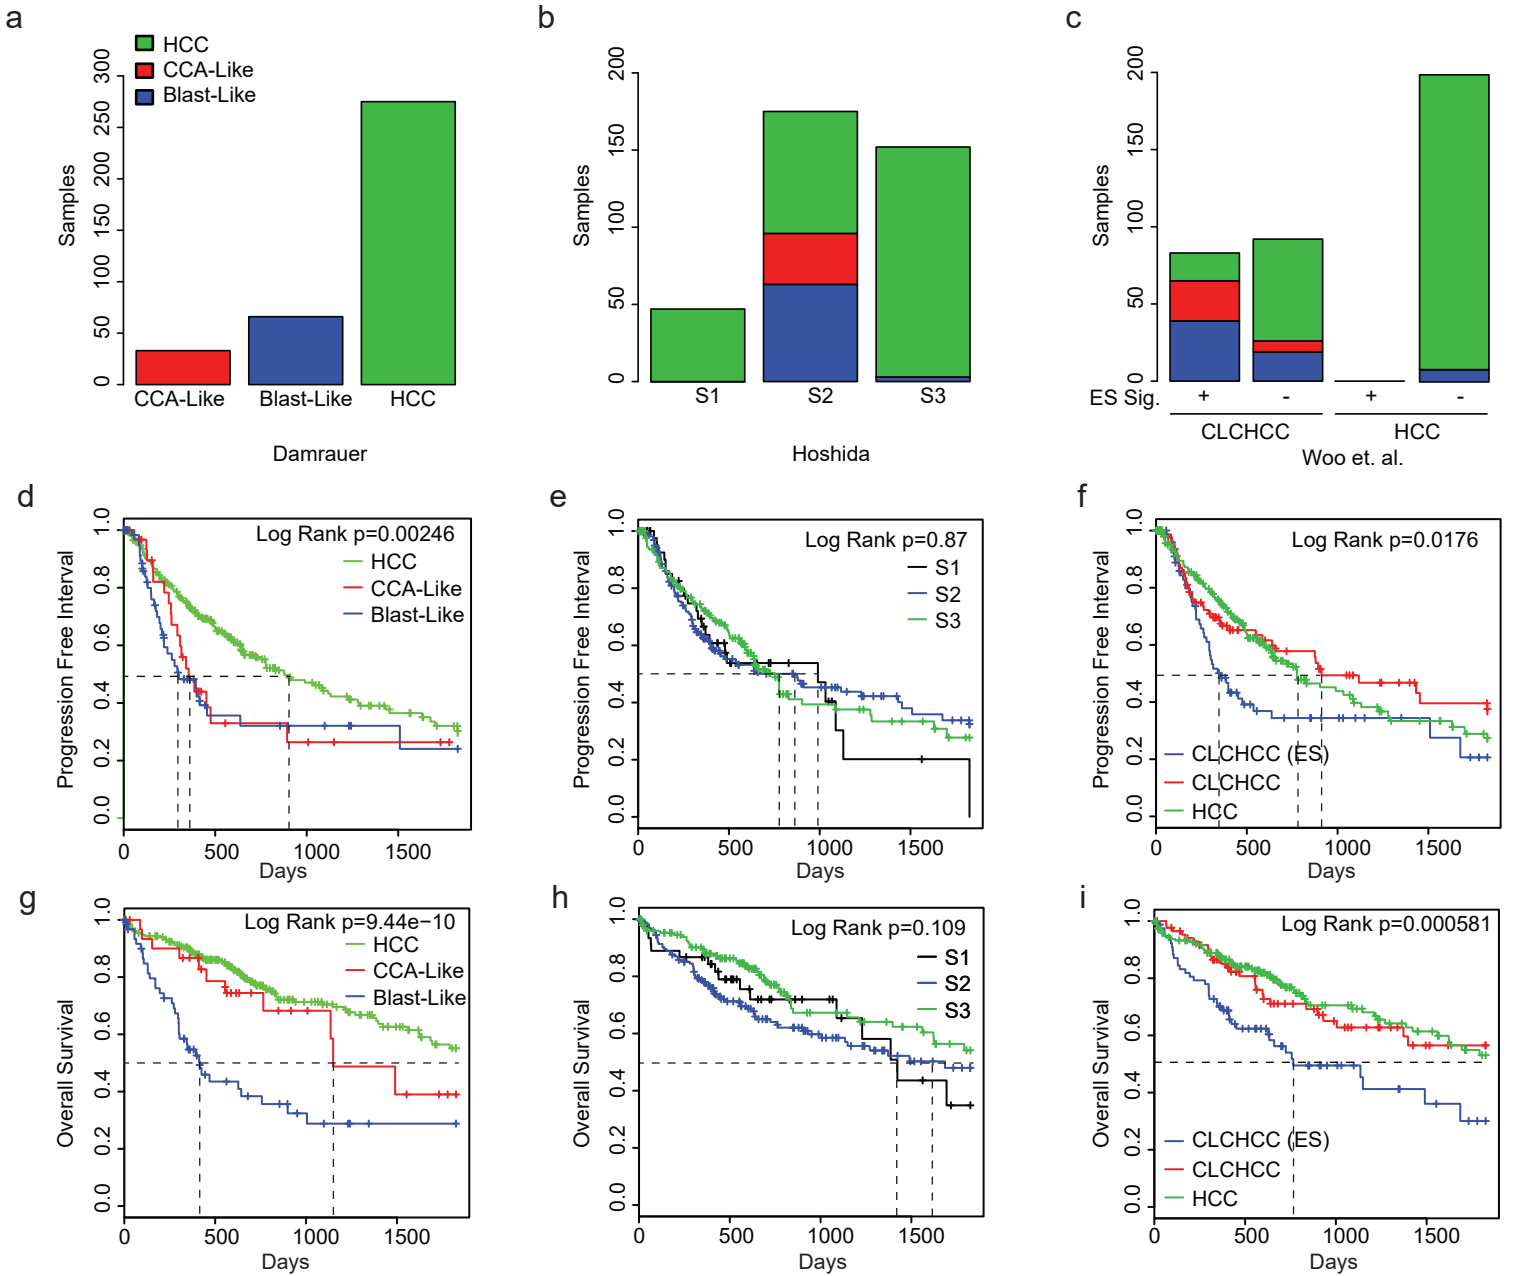

Supplementary Figure 8– (a-c) Hoshida et. al. and Woo et. al. subtype classifications were applied to TCGA cohorts. (d-f) Progression-free and (g-i) overall survival were plotted for the given tumor classifications. Dashed lines represent 50% survival.



Supplemental Table 1. Clinical Characteristics of TCGA CCA and HCC datasets

|                                   | CCA                   | CCA-like                | Blast-like              | HCC                      |
|-----------------------------------|-----------------------|-------------------------|-------------------------|--------------------------|
| <b>No. of Cases</b>               | 36                    | 33                      | 66                      | 272*                     |
| <b>Gender</b>                     |                       |                         |                         |                          |
| Female                            | 20 (56%)              | 20 (61%) <sup>b,c</sup> | 21 (32%)                | 80 (29%)                 |
| Male                              | 16 (44%)              | 13 (39%)                | 45 (68%)                | 192 (71%)                |
| <b>Race</b>                       |                       |                         |                         |                          |
| African American                  | 2 (6%)                | 1 (3%)                  | 3 (5%)                  | 13 (5%)                  |
| Asian                             | 3 (8%)                | 12 (36%)                | 40 (60%) <sup>e</sup>   | 106 (39%)                |
| White                             | 31 (86%)              | 20 (61%)                | 22 (33%)                | 142 (52%)                |
| Other/NA                          | 0 (0%)                | 0 (0%)                  | 1 (2%)                  | 11 (4%)                  |
| <b>Stage</b>                      |                       |                         |                         |                          |
| I                                 | 19 (53%) <sup>b</sup> | 12 (36%)                | 18 (27%)                | 141 (52%) <sup>a,b</sup> |
| II                                | 9 (25%)               | 7 (21%)                 | 22 (33%)                | 57 (21%)                 |
| III                               | 1 (3%)                | 10 (30%)                | 24 (36%)                | 51 (19%)                 |
| IV                                | 7 (19%)               | 0 (0%)                  | 1 (2%)                  | 4 (1%)                   |
| NA                                | 0 (0%)                | 4 (12%)                 | 1 (2%)                  | 19 (7%)                  |
| <b>Grade</b>                      |                       |                         |                         |                          |
| G1                                | 1 (3%)                | 1 (3%)                  | 5 (8%)                  | 49 (18%) <sup>e</sup>    |
| G2                                | 15 (42%)              | 14 (42%)                | 20 (30%) <sup>c</sup>   | 143 (53%)                |
| G3                                | 18 (50%)              | 14 (42%)                | 36 (54%) <sup>c</sup>   | 72 (26%)                 |
| G4                                | 2 (5%)                | 3 (9%) <sup>c</sup>     | 5 (8%) <sup>c</sup>     | 4 (1%)                   |
| NA                                | 0 (0%)                | 1 (3%)                  | 0 (0%)                  | 4 (1%)                   |
| <b>ECOG Score</b>                 |                       |                         |                         |                          |
| 0                                 | 20 (56%)              | 14 (42%)                | 17 (26%) <sup>c,d</sup> | 131 (48%)                |
| 1                                 | 9 (25%)               | 5 (15%)                 | 10 (15%)                | 69 (25%)                 |
| 2                                 | 0 (0%) <sup>b</sup>   | 1 (3%)                  | 11 (17%) <sup>c,d</sup> | 14 (5%)                  |
| 3                                 | 1 (3%)                | 1 (3%)                  | 6 (9%) <sup>d</sup>     | 5 (2%)                   |
| 4                                 | 0 (0%)                | 0 (0%)                  | 3 (5%) <sup>d</sup>     | 0 (0%)                   |
| NA                                | 6 (17%)               | 12 (36%)                | 19 (29%)                | 53 (19%)                 |
| <b>Histology</b>                  |                       |                         |                         |                          |
| Fibrolamellar                     | 0 (0%)                | 0 (0%)                  | 1 (2%)                  | 2 (1%)                   |
| Hepatocellular                    | 0 (0%)                | 28 (85%)                | 64 (97%)                | 269 (99%)                |
| Hepatocholangiocarcinoma          | 0 (0%) <sup>a</sup>   | 5 (15%) <sup>e</sup>    | 1 (2%)                  | 1 (0%)                   |
| <b>HBV infection <sup>f</sup></b> |                       |                         |                         |                          |
| Positive                          | 2 (6%)                | 12 (36%)                | 44 (67%) <sup>e</sup>   | 97 (36%)                 |

|                    |                       |          |                     |                       |
|--------------------|-----------------------|----------|---------------------|-----------------------|
| Negative           | 34 (94%)              | 21 (64%) | 22 (33%)            | 174 (64%)             |
| NA                 | 0 (0%)                | 0 (0%)   | 0 (0%)              | 4 (1%)                |
| Cirrhosis/Fibrosis |                       |          |                     |                       |
| No Fibrosis        | 16 (44%) <sup>e</sup> | 5 (15%)  | 7 (11%)             | 62 (23%)              |
| Fibrosis           | 11 (31%)              | 7 (21%)  | 5 (8%) <sup>d</sup> | 47 (17%)              |
| Cirrhosis          | 0 (0%) <sup>e</sup>   | 5 (15%)  | 10 (15%)            | 64 (24%) <sup>d</sup> |
| NA                 | 9 (25%)               | 16 (48%) | 44 (67%)            | 99 (36%)              |

<sup>a</sup> Significant as compared to CAA.Like (p<0.05)

<sup>b</sup> Significant as compared to Blast.Like (p<0.05)

<sup>c</sup> Significant as compared to HCC (p<0.05)

<sup>d</sup> Significant as compared to CAA (p<0.05)

<sup>e</sup> Significant as compared to all other groups (p<0.05)

<sup>f</sup> HBV infection determined by >5 HBV reads from RNA-seq

\*272/275 samples had unique clinical annotation

Supplemental Table 2. Molecular Characteristics of TCGA CCA and HCC datasets

|                                          | CCA                        | CCA-like                   | Blast-like                 | HCC                        |
|------------------------------------------|----------------------------|----------------------------|----------------------------|----------------------------|
| <b>No. of Cases</b>                      |                            |                            |                            |                            |
|                                          | 36                         | 33                         | 66                         | 275                        |
| <b>IDH</b>                               |                            |                            |                            |                            |
| <i>IDH1/IDH2</i> mutation                | 6                          | 5 <sup>b,c</sup>           | 0                          | 1                          |
| <i>IDH1</i> mRNA (median) <sup>f</sup>   | 11.63 <sup>e</sup>         | 12.43 <sup>e</sup>         | 12.84                      | 13.29                      |
| <b><i>BAP1</i></b>                       |                            |                            |                            |                            |
| <i>BAP1</i> mutation                     | 10<br>(27%) <sup>b,c</sup> | 11<br>(33%) <sup>b,c</sup> | 5 (8%)                     | 25 (9%)                    |
| <i>BAP1</i> copy number loss             | 29 (80%) <sup>e</sup>      | 15<br>(45%) <sup>c,d</sup> | 17 (26%)                   | 33 (12%)                   |
| <i>BAP1</i> mRNA (median) <sup>f</sup>   | 10.3                       | 10.73                      | 11.07                      | 11.12                      |
| <b><i>CTNNB1</i></b>                     |                            |                            |                            |                            |
| <i>CTNNB1</i> mutation                   | 0 (0%)                     | 1 (3%)                     | 18<br>(27%) <sup>a,d</sup> | 79<br>(29%) <sup>a,d</sup> |
| <i>CTNNB1</i> mRNA (median) <sup>f</sup> | 11.84 <sup>b,c</sup>       | 12.43 <sup>b,c</sup>       | 12.6                       | 12.44                      |
| <b><i>TP53</i></b>                       |                            |                            |                            |                            |
| <i>TP53</i> mutation                     | 5 (14%)                    | 8 (27%)                    | 38 (58%) <sup>e</sup>      | 65 (24%)                   |
| <i>TP53</i> copy number loss             | 13 (36%) <sup>e</sup>      | 23 (70%)                   | 45 (68%)                   | 152 (55%)                  |
| <i>TP53</i> mRNA (median) <sup>f</sup>   | 10.83 <sup>e</sup>         | 10.28 <sup>e</sup>         | 9.86                       | 9.55                       |
| <b><i>ARID1A</i></b>                     |                            |                            |                            |                            |
| <i>ARID1A</i> mutation                   | 6 (17%)                    | 0 (0%) <sup>e</sup>        | 11 (17%)                   | 23 (8%)                    |
| <i>ARID1A</i> mRNA (median) <sup>f</sup> | 10.43                      | 10.68 <sup>c</sup>         | 10.56                      | 10.4                       |
| <b><i>ALB</i></b>                        |                            |                            |                            |                            |
| <i>ALB</i> mutation                      | 3 (8%)                     | 1 (3%)                     | 6 (9%)                     | 36 (13%)                   |
| <i>ALB</i> mRNA (median) <sup>f</sup>    | 15.65                      | 19.34                      | 19.58                      | 20.44                      |
| <b><i>AFP</i></b>                        |                            |                            |                            |                            |
| <i>AFP</i> mRNA (median) <sup>f</sup>    | 1.48                       | 8.06 <sup>d</sup>          | 12.97 <sup>e</sup>         | 6.88 <sup>d</sup>          |
| <b><i>HNF4A</i></b>                      |                            |                            |                            |                            |
| <i>HNF4A</i> mRNA (median) <sup>f</sup>  | 9.80 <sup>e</sup>          | 10.84 <sup>e</sup>         | 11.69                      | 12.42                      |
| <b><i>KRT19</i></b>                      |                            |                            |                            |                            |
| <i>KRT19</i> mRNA (median) <sup>f</sup>  | 13.02 <sup>e</sup>         | 11.78 <sup>e</sup>         | 7.04                       | 4.04                       |

<sup>a</sup> Significant as compared to CAA.Like (p<0.05)

<sup>b</sup> Significant as compared to Blast.Like (p<0.05)

<sup>c</sup> Significant as compared to HCC (p<0.05)

<sup>d</sup> Significant as compared to CAA (p<0.05)

<sup>e</sup> Significant as compared to all other groups (p<0.05)

<sup>f</sup> mRNA expression is represented as Log2 median-centered values



Supplemental Table 3. Univariate and multivariate Cox regression analysis

| Univariate analysis              |                           |                           |                       |                  |
|----------------------------------|---------------------------|---------------------------|-----------------------|------------------|
| TCGA                             | Progression Free Interval | Progression Free Interval | Overall Survival      | Overall Survival |
| Subtype (HCC ref)                | Hazard Ratio (95% CI)     | p – value                 | Hazard Ratio (95% CI) | p – value        |
| CCA                              | 1.22 (0.73 - 2.02)        | 0.448                     | 1.90 (1.12 -3.23)     | <b>0.017</b>     |
| CCA-Like                         | 1.68 (1.02 - 2.76)        | <b>0.04</b>               | 1.45 (0.77 – 2.73)    | 0.245            |
| Blast.Like                       | 1.95 (1.32 – 2.88)        | <b>&lt;0.001</b>          | 3.72 (2.48 – 5.56)    | <b>&lt;0.001</b> |
| Stage (I ref)                    |                           |                           |                       |                  |
| II                               | 1.96 (1.38 – 2.77)        | <b>&lt;0.001</b>          | 1.63 (1.06 – 2.50)    | <b>0.027</b>     |
| III                              | 2.35 (1.63 – 3.40)        | <b>&lt;0.001</b>          | 2.56 (1.69 – 3.87)    | <b>&lt;0.001</b> |
| IV                               | 4.28 (2.20 – 8.35)        | <b>&lt;0.001</b>          | 5.26 (2.65 – 10.47)   | <b>&lt;0.001</b> |
| Grade (G1 ref)                   |                           |                           |                       |                  |
| G2                               | 1.44 (0.89 – 2.32)        | 0.133                     | 1.34 (0.76 – 2.35)    | 0.316            |
| G3                               | 1.55 (0.95 – 2.52)        | 0.078                     | 1.39 (0.78 – 2.48)    | 0.259            |
| G4                               | 1.51 (0.61 – 3.75)        | 0.775                     | 2.46 (1.00 – 6.06)    | <b>0.05</b>      |
| Multivariate analysis            |                           |                           |                       |                  |
| Subtype + Stage (HCC ref)        |                           |                           |                       |                  |
| CCA                              | 1.31 (0.79 – 2.18)        | 0.301                     | 2.06 (1.21 – 3.51)    | <b>&lt;0.01</b>  |
| CCA-Like                         | 1.57 (0.95 – 2.59)        | 0.078                     | 1.39 (0.73 – 2.63)    | 0.318            |
| Blast.Like                       | 1.70 (1.14 – 2.54)        | <b>&lt;0.01</b>           | 3.43 (2.28 – 5.17)    | <b>&lt;0.001</b> |
| Subtype + Stage +Grade (HCC ref) |                           |                           |                       |                  |
| CCA                              | 1.25 (0.72 – 2.11)        | 0.403                     | 2.12 (1.22 – 3.68)    | <b>&lt;0.01</b>  |
| CCA-Like                         | 1.15 (0.85 – 2.46)        | 0.171                     | 1.27 (0.64 – 2.50)    | 0.496            |
| Blast-Like                       | 1.62 (1.07 – 2.46)        | <b>0.023</b>              | 3.30 (2.14 – 5.09)    | <b>&lt;0.001</b> |
| GSE14520                         |                           |                           |                       |                  |
| Subtype (HCC ref)                |                           |                           |                       |                  |
| CCA-Like                         | 1.49 (0.88 – 2.54)        | 0.142                     | 1.60 (0.83 – 3.10)    | 0.161            |
| Blast-Like                       | 1.56 (1.06 – 2.30)        | <b>0.025</b>              | 1.97 (1.24 – 3.14)    | <b>0.004</b>     |
| Stage (I ref)                    |                           |                           |                       |                  |
| II                               | 1.99 (1.30 – 3.05)        | <b>&lt;0.01</b>           | 2.07 (1.19 – 3.61)    | <b>0.01</b>      |
| III                              | 3.17 (1.98 – 5.08)        | <b>&lt;0.001</b>          | 5.10 (2.92 – 8.93)    | <b>&lt;0.001</b> |
| Multivariate analysis            |                           |                           |                       |                  |
| Subtype + Stage (HCC ref)        |                           |                           |                       |                  |
| CCA-Like                         | 1.1 (0.63 – 1.91)         | 0.745                     | 1.11 (0.56 – 2.18)    | 0.77             |
| Blast-Like                       | 1.730 (0.87 – 1.95)       | 0.199                     | 1.60 (.99 – 2.59)     | 0.054            |

Supplemental Table 4 - Bonferroni corrected pvalues of pairwise t-test between mutational signatures and subclasses

|                               | <b>S1</b>     | <b>S2</b> | <b>S3</b> | <b>S4</b>      | <b>S5</b>       | <b>S6</b>       |
|-------------------------------|---------------|-----------|-----------|----------------|-----------------|-----------------|
| <b>CCA vs CCA-Like</b>        | 1             | 1         | 1         | 1              | 0.26            | 0.95285         |
| <b>CCA vs Blast-Like</b>      | <b>0.002</b>  | 1         | 0.078     | <b>0.00039</b> | <b>2.10E-11</b> | <b>0.00031</b>  |
| <b>CCA vs HCC</b>             | <b>0.0024</b> | 1         | 0.093     | 0.16226        | <b>2.10E-15</b> | <b>6.40E-09</b> |
| <b>CCA-Like vs Blast-Like</b> | 0.0696        | 1         | 0.055     | 0.06847        | <b>7.40E-05</b> | 0.15424         |
| <b>CCA-Like vs HCC</b>        | 0.1356        | 0.11      | 0.067     | 1              | <b>2.40E-06</b> | <b>0.00075</b>  |
| <b>Blast-Like vs HCC</b>      | 1             | 1         | 1         | <b>0.00854</b> | 1               | 0.39735         |

Bolded values denote  $p < 0.05$
