# Supplementary material for: Genomic characterization of rare molecular subclasses of hepatocellular carcinoma
Source: PubMed Central journal article supplement (PMC8490450; doi:10.1038/s42003-021-02674-1), 2021-10-04
Supplement: 42003_2021_2674_MOESM2_ESM.pdf [file 42003_2021_2674_MOESM2_ESM.pdf]

## **Description of Supplementary Files**

**File name:** Supplementary data 1

**Description:** Per Sample subclass calls with the corresponding correlations to CCA and Blast centroids.

**File name:** Supplementary data 2

**Description:** 150 gene classifier with corresponding subgroup centroid values.
